# Supplementary material for: Altered Mucosal Immune-Microbiota Interactions in Familial Adenomatous Polyposis
Source: PubMed Central journal article supplement (PMC10476795; doi:10.14309/ctg.0000000000000428), 2022-03-16
Supplement: ct9-13-e00428-s003.pdf [file ct9-13-e00428-s003.pdf]

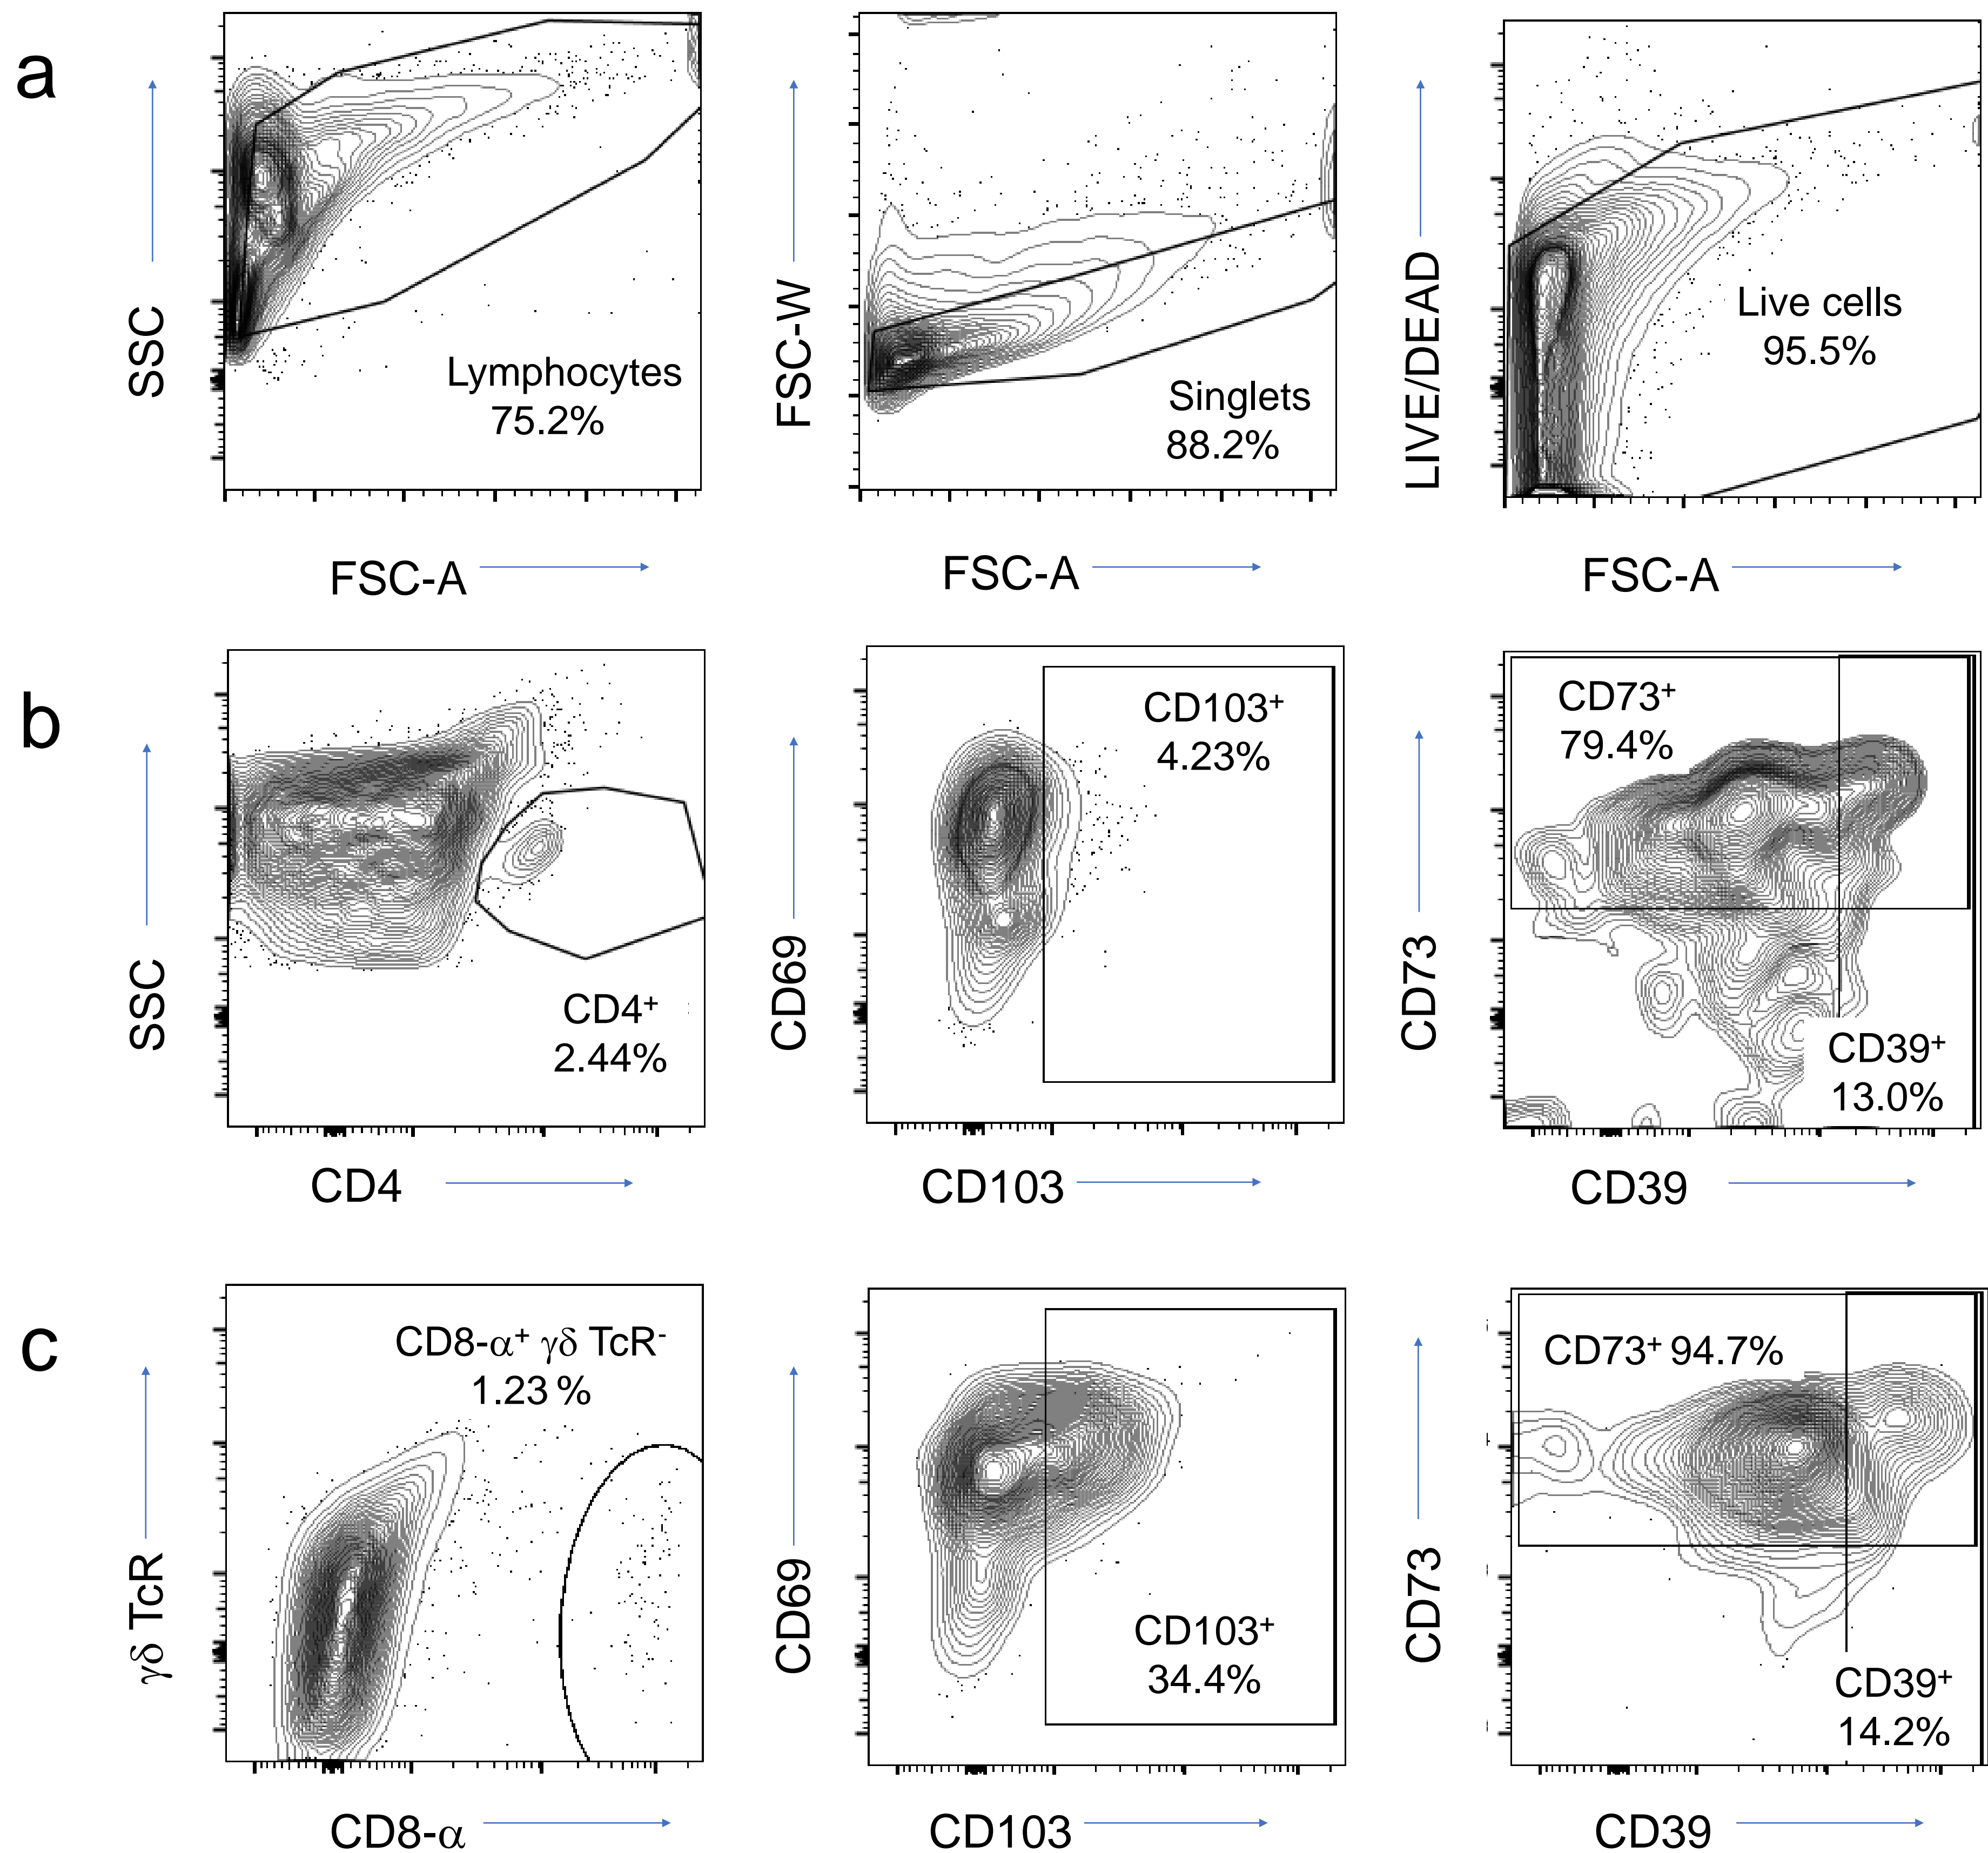

**Supplementary Figure 2.** LPL gating strategies. **a.** Sequential gates for live lymphocytes. **b:** Sequential gates for CD4<sup>+</sup> CD103<sup>+</sup> Trm expressing CD39 & CD73. **c:** Sequential gates for CD8<sup>+</sup> CD103<sup>+</sup> Trm expressing CD39 & CD73.
